# Supplementary material
Source: Springer Nature journal article supplement (https://www.springerprofessional.de/resource/supplementary/13638_2014_1052_MOESM23_ESM.pdf/11898858)

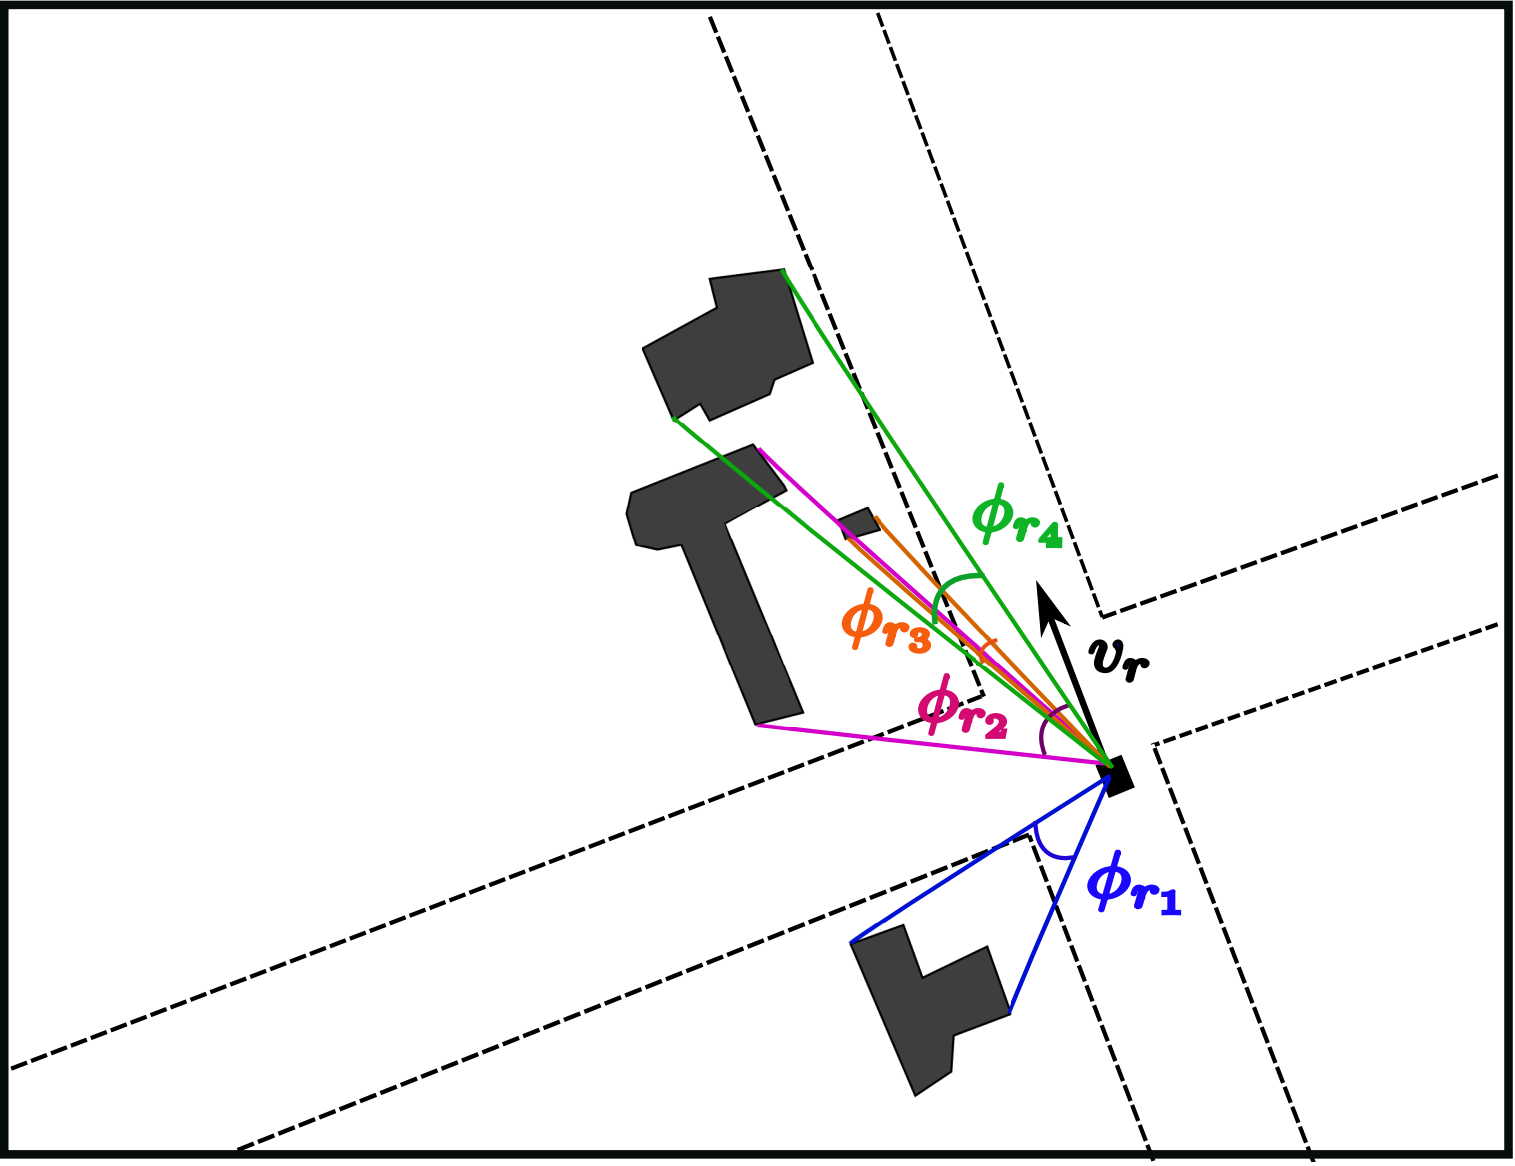

Supplement: MOESM23 [file 11898858]
